# Supplementary material for: Transition of Serotype 35B Pneumococci From Commensal to Prevalent Virulent Strain in Children
Source: Front Cell Infect Microbiol. 2021 Oct 26;11:744742. doi: 10.3389/fcimb.2021.744742 (PMC8577857; doi:10.3389/fcimb.2021.744742)
Supplement: Technical Appendix — Clinical information, SRA accession numbers, PBP typing, MLST alleles and Phenotypic antimicrobial susceptibility of each isolate determined with WGS is shown. [file DataSheet_1.xlsx]

## Sheet: side_by_side_mlst
Technical appendix. Clinical information, SRA accession numbers, PBP typing, MLST alleles and Phenotypic antimicrobial susceptibility.
SRA Accession number	Sample name	Subject ID	Visit day	Visit Type1	Sampling site	Serotype	PBP2x	PBP1a	PBP2b	mlst	aroE	gdh	gki	recP	spi	xpt	ddl	Amoxicillin	Cefotaxime	Ceftriaxone	Ertapenem	Meropenem	Ofloxacin	Penicillin
SAMN19548994	PP1	08-02-0096	2010-02-24	24 months	NP	35B	2x7	1a4 *	2b7	558	18	12	4	44	14	77	97	1	<=0.06	<=0.06	1	<=0.06	<=1	0.5
SAMN19573813	PP11	12-03-0135	2013-06-05	18 months	NP	35B	2x7	1a4	2b7	558	18	12	4	44	14	77	97	1	<=0.06	<=0.06	<=0.5	<=0.06	<=1	0.12
SAMN19573814	PP12	13-02-0527	2013-12-13	06 months	NP	35B	2x7	1a4	2b7	558	18	12	4	44	14	77	97	1	0.5	0.5	1	0.5	<=1	1
SAMN19573815	PP13	13-02-0550	2014-05-13	09 months	NP	35B	2x7	1a4	2b7	558	18	12	4	44	14	77	97	1	0.5	0.25	<=0.5	0.5	<=1	0.5
SAMN19573816	PP14	13-02-0509	2014-02-12	09 months	NP	35B	2x7	1a4	2b7	558	18	12	4	44	14	77	97	1	0.25	0.25	<=0.5	0.5	<=1	0.25
SAMN19573809	PP15	11-02-0360	2014-01-30	36 months	NP	35B	-	1a4	-	-	18	12	4	44	14	-	97	1	0.5	0.25	<=0.5	0.5	2	0.5
SAMN19573810	PP16	12-02-0459	2015-05-27	36 months	NP	35B	2x7	1a4	2b7 **	558	18	12	4	44	14	77	97	NA	NA	NA	NA	NA	NA	NA
SAMN19548995	PP2	10-02-0341	2011-07-28	09 months	NP	35B	2x7	1a4	2b7	558	18	12	4	44	14	77	97	0.25	<=0.06	<=0.06	<=0.5	0.12	<=1	0.25
SAMN19573817	PP3	10-02-0341	2011-04-28	06 months	NP	35B	2x7	1a4	2b7	558	18	12	4	44	14	77	97	1	0.25	0.25	1	0.5	<=1	0.25
SAMN19548996	PP4	10-02-0275	2011-11-04	18 months	NP	35B	2x7	1a4	2b7	558	18	12	4	44	14	77	97	1	0.5	0.5	1	0.5	<=1	0.5
SAMN19548997	PP5	10-02-0323	2012-03-15	18 months	NP	35B	2x7	1a4	2b7	558	18	12	4	44	14	77	97	1	0.25	0.25	<=0.5	0.5	<=1	0.25
SAMN19573818	PP6	11-02-0381	2012-04-12	09 months	NP	35B	2x7	1a4	2b7	-	-	12	4	44	14	77	97	1	0.25	0.12	<=0.5	0.12	<=1	0.25
SAMN19573819	PP9	10-02-0330	2013-10-07	36 months	NP	35B	2x7	1a4	2b7	558	18	12	4	44	14	77	97	4	1	0.5	1	0.5	<=1	>=2
SAMN19548999	S291	17-02-0857	2018-07-25	09 months	NP	35B	2x7	1a4	2b7	558	18	12	4	44	14	77	97	NA	NA	NA	NA	NA	NA	NA
SAMN19549000	S299	17-02-0867	2018-06-19	12 months	NP	35B	2x7	1a4	2b7	558	18	12	4	44	14	77	97	0.25	<=0.06	0.12	<=0.5	0.25	<=1	NA
SAMN19549001	S307	17-02-0727	2018-04-30	AOM F/U	NP	35B	2x7	1a4	2b12	156	7	11	10	1	6	8	1	4	1	1	1	1	<=1	1
SAMN19549002	S312	17-02-0727	2018-06-12	AOM	NP	35B	2x7	1a4	2b12	156	7	11	10	1	6	8	1	4	1	1	1	1	<=1	1
SAMN19549003	S326	17-02-0780	2018-08-21	15 months	NP	35B	2x7	1a4	2b7	558	18	12	4	44	14	77	97	2	1	0.5	1	1	2	1
SAMN19549004	S329	17-02-0799	2018-06-06	12 months	NP	35B	2x7	1a4	2b12	156	7	11	10	1	6	8	1	2	1	2	1	1	<=1	1
SAMN19549005	S335	17-02-0807	2018-04-26	AOM	NP	35B	2x7	1a4	2b7	558	18	12	4	44	14	77	97	2	1	0.5	1	1	2	1
SAMN19549006	S350/S721	17-02-0839	2018-05-16	06 months	NP	35B	2x7	1a4	2b7	558	18	12	4	44	14	77	97	NA	NA	NA	NA	NA	NA	NA
SAMN19549007	S356	17-02-0855	2018-08-17	18 months	NP	35B	2x7	1a4	2b7	10493	8	12	4	44	14	77	97	2	1	0.5	1	1	<=1	1
SAMN19549008	S357/S722	17-02-0858	2018-06-08	06 months	NP	35B	2x7	1a4	2b7	558	18	12	4	44	14	77	97	NA	NA	NA	NA	NA	NA	NA
SAMN19549009	S363/S723	17-02-0878	2018-06-28	AOM	MEF	35B	2x7	1a4	2b7	558	18	12	4	44	14	77	97	NA	NA	NA	NA	NA	NA	NA
SAMN19549010	S395	17-02-0815	2018-11-07	12 months	NP	35B	2x7	1a4	2b7	558	18	12	4	44	14	77	97	NA	NA	NA	NA	NA	NA	NA
SAMN19549045	S397	17-02-0800	2018-05-11	AOM	NP	35B	2x7	1a4	2b12	-	-	11	10	1	6	8	1	1	0.25	0.25	<=0.5	0.5	<=1	1
SAMN19549011	S398	17-02-0858	2018-09-10	09 months	NP	35B	2x7	1a4	2b7	558	18	12	4	44	14	77	97	NA	<=0.06	<=0.06	<=0.5	0.25	<=1	NA
SAMN19549012	S399	17-02-0727	2018-10-04	18 months	NP	35B	2x7	1a4	2b12	156	7	11	10	1	6	8	1	4	1	0.5	1	1	<=1	1
SAMN19549013	S400	17-02-0856	2018-10-22	18 months	NP	35B	2x7	1a4	2b7	558	18	12	4	44	14	77	97	NA	NA	NA	NA	NA	NA	NA
SAMN19549014	S413	17-02-0708	2019-01-08	18 months	NP	35B	2x7	1a4	2b7	558	18	12	4	44	14	77	97	1	0.12	0.12	<=0.5	0.5	<=1	NA
SAMN19549015	S424	17-02-0839	2019-01-30	AOM	NP	35B	2x7	1a4	2b7	558	18	12	4	44	14	77	97	4	1	0.5	1	0.5	2	1
SAMN19549016	S428	17-02-0738	2019-02-08	24 months	NP	35B	2x7	1a4	2b7	558	18	12	4	44	14	77	97	NA	NA	NA	NA	NA	NA	NA
SAMN19549017	S435	17-02-0751	2019-02-13	18 months	NP	35B	2x7	1a4	2b7	558	18	12	4	44	14	77	97	1	<=0.06	<=0.06	<=0.5	0.25	<=1	NA
SAMN19549018	S440	17-02-0782	2019-02-28	AOM F/U	NP	35B	2x7	1a4	2b12	156	7	11	10	1	6	8	1	4	1	0.5	1	1	<=1	1
SAMN19549019	S470	18-02-0903	2018-09-11	AOM	MEF	35B	2x7	1a4	2b7	10493	8	12	4	44	14	77	97	NA	NA	NA	NA	NA	NA	NA
SAMN19573821	S471	18-02-0903	2018-09-11	AOM	NP	35B	2x7	1a4	2b7	10493	8	12	4	44	14	77	97	2	1	0.5	1	1	2	1
SAMN19549020	S495	17-02-0839	2018-08-23	09 months	NP	35B	2x7	1a4	2b7	558	18	12	4	44	14	77	97	4	1	1	2	1	2	1
SAMN19549021	S517	17-02-0800	2018-04-20	12 months	NP	35B	2x7	1a4	2b12	-	-	11	10	1	6	8	1	4	1	0.5	1	1	2	1
SAMN19549022	S523	17-02-0784	2018-04-09	AOM	MEF	35B	2x7	1a4	2b7	558	18	12	4	44	14	77	97	1	0.25	0.25	1	0.5	2	1
SAMN19549042	S531	17-02-0776	2018-11-21	18 months	NP	15A	2x143	1a24	2b27	63	2	5	36	12	17	21	14	0.25	0.25	0.12	<=0.5	<=0.06	2	0.25
SAMN19549043	S532	17-02-0776	2018-09-19	12 months	NP	15A	2x143	1a24	2b27	63	2	5	36	12	17	21	14	0.25	0.5	0.25	<=0.5	<=0.06	4	0.25
SAMN19549044	S534	17-02-0776	2018-03-29	AOM	MEF	15A	2x143	1a24	2b27	63	2	5	36	12	17	21	14	0.25	1	0.5	<=0.5	<=0.06	2	0.25
SAMN19573822	S542	17-02-0751	2018-11-12	15 months	NP	35B	2x7	1a4	2b7	558	18	12	4	44	14	77	97	1	0.25	0.5	1	0.5	2	1
SAMN19549023	S547	17-02-0748	2018-09-06	18 months	NP	35B	2x7	1a4	2b7	558	18	12	4	44	14	77	97	1	0.25	0.25	1	0.5	<=1	1
SAMN19549024	S548	17-02-0748	2018-03-09	AOM	NP	35B	2x7	1a4	2b7	558	18	12	4	44	14	77	97	NA	NA	NA	NA	NA	NA	NA
SAMN19549025	S550	17-02-0743	2018-11-16	15 months	NP	35B	2x7	1a4	2b12	156	7	11	10	1	6	8	1	2	1	0.5	1	1	<=1	0.5
SAMN19549026	S553	17-02-0727	2018-01-19	09 months	NP	35B	2x7	1a4	2b12	156	7	11	10	1	6	8	1	1	0.25	0.5	1	0.5	2	1
SAMN19549027	S558	17-02-0720	2017-12-22	AOM	MEF	35B	2x73	new	2b7	14683	2	10	36	12	17	21	97	4	1	2	2	2	2	4
SAMN19549028	S576	17-02-0700	2017-12-15	AOM	MEF	35B	2x7	1a4	2b7	558	18	12	4	44	14	77	97	1	<=0.06	0.12	<=0.5	NA	NA	NA
SAMN19573823	S577	17-02-0700	2017-12-15	AOM	NP	35B	2x7	1a4	2b7	558	18	12	4	44	14	77	97	1	0.5	0.5	1	0.5	<=1	1
SAMN19573824	S580	17-02-0694	2017-12-01	AOM	MEF	35B	2x7	1a4	2b7	558	18	12	4	44	14	77	97	NA	NA	NA	NA	NA	NA	NA
SAMN19549029	S581	17-02-0694	2017-12-01	AOM	NP	35B	2x7	1a4	2b7	558	18	12	4	44	14	77	97	NA	NA	NA	NA	NA	NA	NA
SAMN19573825	S589	15-03-0152	2016-06-28	AOM F/U	NP	35B	2x7	1a4	2b7	-	18	12	4	44	17	-	97	1	0.5	0.5	1	0.5	2	1
SAMN19549030	S590	15-03-0152	2016-06-02	AOM	MEF-R	35B	2x7	1a4	2b7	558	18	12	4	44	14	77	97	4	0.5	0.5	1	0.5	2	1
SAMN19573826	S591	15-03-0152	2016-06-02	AOM	MEF-L	35B	2x7	1a4	2b7	558	18	12	4	44	14	77	97	1	0.25	0.25	<=0.5	0.5	2	1
SAMN19549031	S592	15-03-0152	2016-06-02	AOM	NP	35B	2x7	1a4	2b7	558	18	12	4	44	14	77	97	4	1	0.5	1	0.5	2	1
SAMN19549032	S593	15-03-0149	2016-06-01	AOM	NP	35B	2x7	1a4	2b7	-	18	12	-	44	14	77	97	NA	NA	NA	NA	NA	NA	NA
SAMN19573811	S602	15-02-0626	2016-01-25	AOM	NP	35B	2x7	1a4	2b7	558	18	12	4	44	14	77	97	NA	NA	NA	NA	NA	NA	NA
SAMN19573820	S617	14-02-0592	2015-04-07	12 months	NP	35B	2x7	1a4	2b7	558	18	12	4	44	14	77	97	2	1	0.5	1	1	2	1
SAMN19549041	S673	13-02-0564	2015-10-23	24 months	NP	15A	2x11	1a24	2b27	63	2	5	36	12	17	21	14	NA	NA	NA	NA	NA	NA	NA
SAMN19548998	S683	13-02-0557	2015-03-10	18 months	NP	35B	2x7	1a4	2b7	558	18	12	4	44	14	77	97	4	1	0.5	2	1	2	1
SAMN19549040	S684	13-02-0556	2015-09-04	24 months	NP	15A	2x13	1a24	2b27	63	2	5	36	12	17	21	14	NA	NA	NA	NA	NA	NA	NA
SAMN19573827	S724	17-02-0878	2018-06-28	AOM	MEF	35B	2x7	1a4	2b7	558	18	12	4	44	14	77	97	<=0.06	<=0.06	<=0.06	<=0.5	<=0.06	<=1	<=0.06
SAMN19549046	S813	18-02-0976	2019-04-10	15 months	NP	35B	2x7	1a4	2b12	14687	7	11	10	1	223	8	1	4	1	0.5	1	1	2	1
SAMN19549033	S825	17-02-0771	2019-04-30	18 months	NP	35B	2x7	1a4	2b7	10493	8	12	4	44	14	77	97	4	1	0.5	1	0.5	2	1
SAMN19573828	S845	17-02-0815	2019-05-08	18 months	NP	35B	2x7	1a4	2b7	10493	8	12	4	44	14	77	97	4	1	0.5	2	1	2	1
SAMN19549034	S846	17-02-0814	2019-05-08	18 months	NP	35B	2x7	1a4	2b7	10493	8	12	4	44	14	77	97	0.25	0.12	>=4	1	1	<=1	NA
SAMN19549035	S847	18-02-0919	2019-05-02	15 months	NP	35B	2x7	1a4	2b7	558	18	12	4	44	14	77	97	1	0.12	0.25	<=0.5	0.5	2	1
SAMN19549036	S849	18-02-0941	2019-05-02	15 months	NP	35B	2x7	1a4	2b7	-	18	12	-	44	14	77	97	0.25	<=0.06	<=0.06	<=0.5	0.12	2	0.25
SAMN19573829	S853	17-02-0856	2019-03-18	AOM	NP	35B	2x7	1a4	2b7	558	18	12	4	44	14	77	97	NA	NA	NA	NA	NA	NA	NA
SAMN19573830	S854	17-02-0858	2019-03-07	12 months	NP	35B	2x7	1a4	2b7	558	18	12	4	44	14	77	97	NA	NA	NA	NA	NA	NA	NA
SAMN19573831	S855	18-02-0923	2019-03-18	AOM	NP	35B	2x7	1a4	2b7	558	18	12	4	44	14	77	97	NA	NA	NA	NA	NA	NA	NA
SAMN19549037	S856	18-02-0968	2019-03-21	12 months	NP	35B	2x7	1a4	2b7	10493	8	12	4	44	14	77	97	NA	NA	NA	NA	NA	NA	NA
SAMN19573832	S857	18-02-0983	2019-06-12	18 months	NP	35B	2x7	1a4	2b7	558	18	12	4	44	14	77	97	NA	NA	NA	NA	NA	NA	NA
SAMN19549038	S858	18-02-0999	2019-04-03	AOM	NP	35B	2x7	1a4	2b7	10493	8	12	4	44	14	77	97	NA	NA	NA	NA	NA	NA	NA
SAMN19573833	S860	18-02-1005	2019-04-18	AOM	NP	35B	2x7	1a4	2b7	558	18	12	4	44	14	77	97	NA	NA	NA	NA	NA	NA	NA
SAMN19549039	S861	18-02-1005	2019-04-18	AOM	MEF	35B	2x7	1a4	2b7	558	18	12	4	44	14	77	97	NA	NA	NA	NA	NA	NA	NA
